# Supplementary material for: Amorphous film of cerium doped cobalt oxide as a highly efficient electrocatalyst for oxygen evolution reaction
Source: Royal Society of Chemistry journal article supplement (doi:10.1039/c9ta00061e), 2019-01-01
Supplement: c9ta00061e1.pdf [file c9ta00061e1.pdf]

**Amorphous film of cerium doped cobalt oxide as a highly efficient electrocatalyst for oxygen evolution reaction**

Shichen Xu,<sup>a</sup> Cuncai Lv,<sup>b</sup> Tong He,<sup>a</sup> Zhipeng Huang,<sup>a\*</sup> and Chi Zhang<sup>a\*</sup>

<sup>a</sup> *School of Chemical Science and Engineering, Tongji University, Shanghai, 200092, PR China.*

<sup>b</sup> *Hebei Key Lab of Optic-electronic Information and Materials, The College of Physics Science and Technology, Hebei University, Baoding, 071002, China.*

*Corresponding author. Zhipeng Huang ([zphuang@tongji.edu.cn](mailto:zphuang@tongji.edu.cn)), Chi Zhang ([chizhang@tongji.edu.cn](mailto:chizhang@tongji.edu.cn))*

Electronic Supplementary Information (ESI)

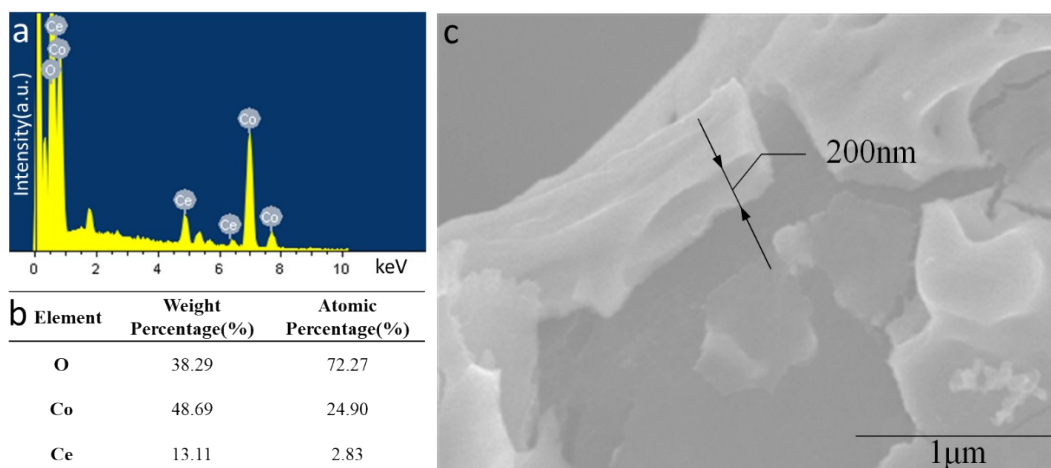

**Figure S1.** (a) EDS spectrum, (b) element content, and (b) SEM image of CoO<sub>x</sub>(Ce).

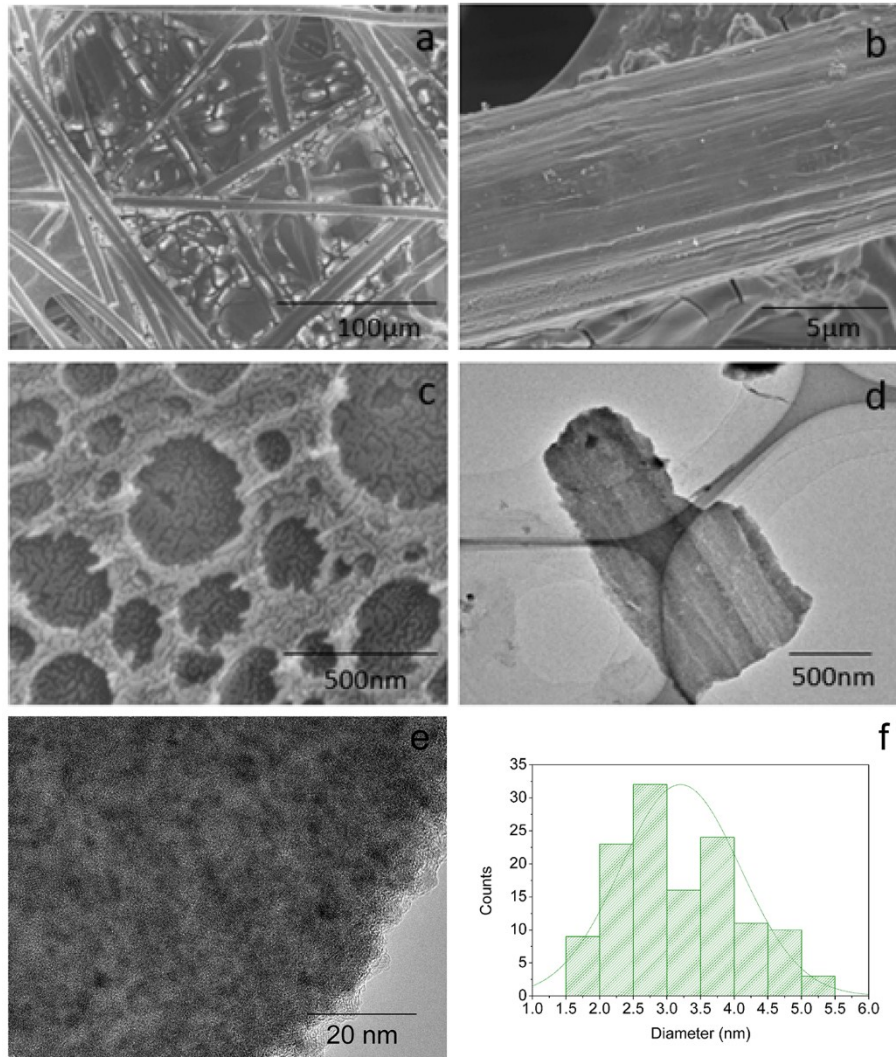

**Figure S2.** (a, b, c) SEM images and (d,e) TEM image of  $\text{CoO}_x$ . (f) Size distribution histogram of  $\text{CoO}_x$  grains derived TEM images.

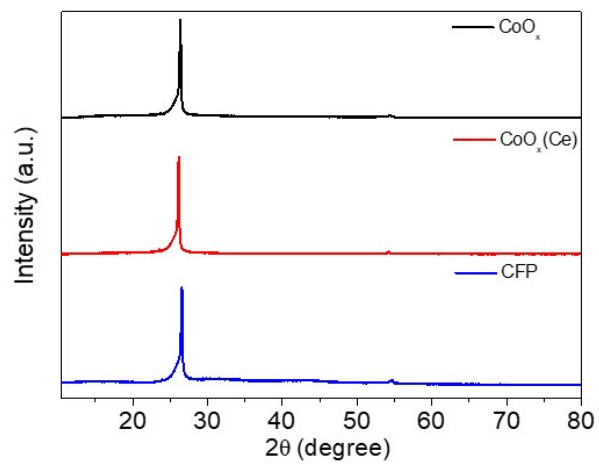

**Figure S3.** XRD pattern of CoO<sub>x</sub>(Ce), CoO<sub>x</sub>, and bare CFP.

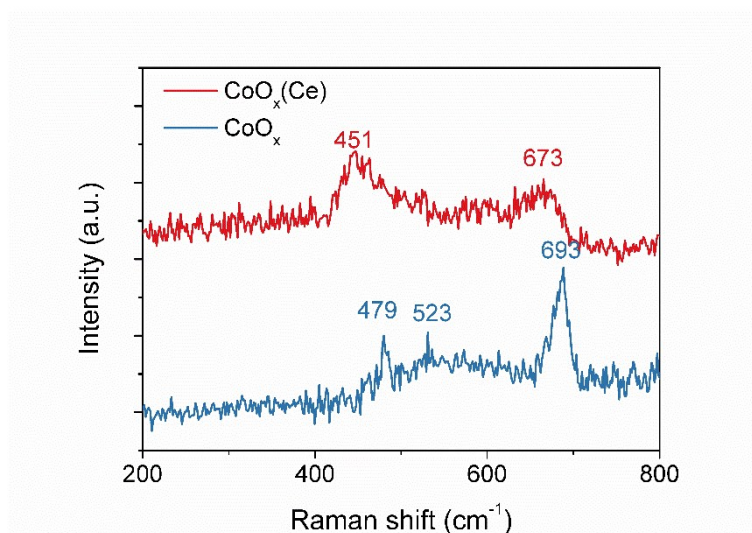

**FigureS4.** Raman spectra of CoO<sub>x</sub>(Ce) and CoO<sub>x</sub>.

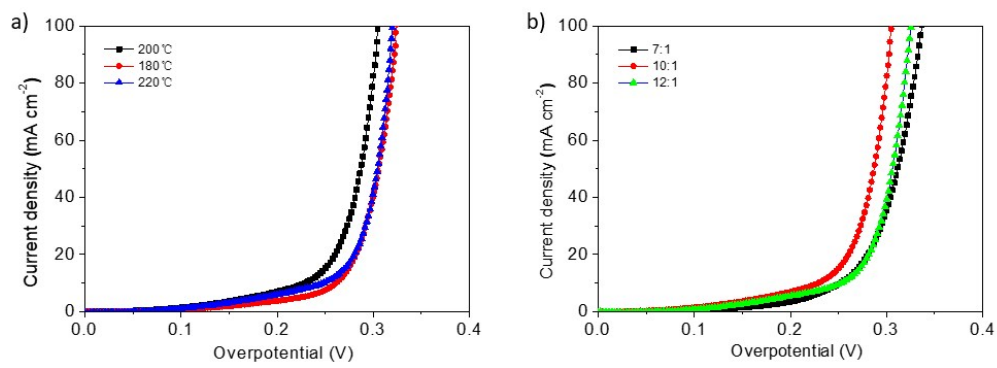

**Figure S5.** Polarization curves of  $\text{CoO}_x(\text{Ce})$  synthesized (a) at different temperatures and (b) with different atomic ratio of Co to Ce.

**Table S1.** Performance of typical reported OER electrocatalysts in alkaline media.

| Electrocatalysts                                                           | $\eta_{10}$<br>(mV) | $\eta_{20}$<br>(mV) | $\eta_{100}$<br>(mV) | Tafel slope<br>(mV/dec) | Electrolyte<br>(M KOH) |
|----------------------------------------------------------------------------|---------------------|---------------------|----------------------|-------------------------|------------------------|
| CoO <sub>x</sub> (Ce) (This work)                                          | 229                 | 261                 | 302                  | 63.7                    | 1.0                    |
| CoO <sub>x</sub> PHCS <sup>[1]</sup>                                       |                     | 270                 | 300                  | 40                      | 1.0                    |
| CeO <sub>2</sub> /CoSe <sub>2</sub> <sup>[2]</sup>                         | 288                 | 324                 |                      | 44                      | 0.1                    |
| Co <sub>3</sub> O <sub>4</sub> <sup>[3]</sup>                              | 270                 |                     |                      | 70                      | 0.1                    |
| Co <sub>3</sub> O <sub>4</sub> /Co-Fe oxide DSNBs <sup>[4]</sup>           | 297                 |                     |                      | 61                      | 1.0                    |
| Co-B@CoO/Ti <sup>[5]</sup>                                                 | 190                 |                     |                      | 78                      | 1.0                    |
| CoCH/NF <sup>[6]</sup>                                                     | 332                 |                     |                      | 126                     | 1.0                    |
| NiFe-NS <sup>[7]</sup>                                                     | 304                 | 333                 |                      | 40                      | 1.0                    |
| CoS@NF <sup>[8]</sup>                                                      | 297                 | 330                 |                      | 106                     | 1.0                    |
| Co(OH) <sub>2</sub> -Co <sub>2</sub> [Fe(CN) <sub>6</sub> ] <sup>[9]</sup> | 304                 |                     |                      | 38                      | 1.0                    |
| Co/Fe <sup>[10]</sup>                                                      | 330                 | 350                 |                      | 37                      | 1.0                    |
| Ni <sub>2</sub> Fe-LDHs <sup>[11]</sup>                                    | 289                 |                     |                      | 39                      | 1.0                    |
| CoP@RGO <sup>[12]</sup>                                                    | 280                 | 320                 | 440                  | 75                      | 1.0                    |
| CuO/Co <sub>3</sub> O <sub>4</sub> <sup>[13]</sup>                         | 227                 | 290                 | 360                  |                         | 1.0                    |
| NiCoO <sub>2</sub> /CoO/Ni <sub>3</sub> N <sup>[14]</sup>                  | 247                 |                     |                      | 35                      | 1.0                    |
| NiO/CoN PINWs <sup>[15]</sup>                                              | 300                 | 325                 | 385                  | 35                      | 1.0                    |

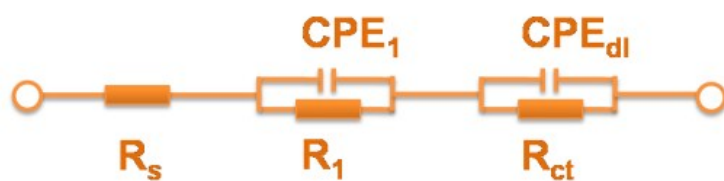

**Figure S6.** Equivalent circuit used to fit the EIS data.  $R_0$  is series resistance,  $CPE_1$  and  $R_1$  are the constant phase element and the resistance describing electron transport at the substrate/catalyst interface, respectively,  $CPE_{dl}$  is the constant phase element of the catalyst/electrolyte interface, and  $R_{ct}$  is the charge-transfer resistance at the catalyst/electrolyte interface.



**Table S2.** Values of equivalent circuit elements resulted from fitting of EIS data.

| Sample                | $R_s$<br>( $\Omega$ ) | $Q_1$<br>( $F\text{ cm}^{-2}\text{ S}^{n-1}$ ) | $n_1$  | $R_1$<br>( $\Omega$ ) | $Q_{dl}$<br>( $F\text{ cm}^{-2}\text{ S}^{n-1}$ ) | $n_{dl}$ | $R_{ct}$<br>( $\Omega$ ) |
|-----------------------|-----------------------|------------------------------------------------|--------|-----------------------|---------------------------------------------------|----------|--------------------------|
| CoO <sub>x</sub> (Ce) | 2.313                 | 4.19E-5                                        | 0.0395 | 3.462                 | 0.7881                                            | 0.5783   | 15.2                     |
| CoO <sub>x</sub>      | 2.436                 | 2.57E-5                                        | 0.0216 | 4.279                 | 0.8149                                            | 0.6155   | 70.8                     |

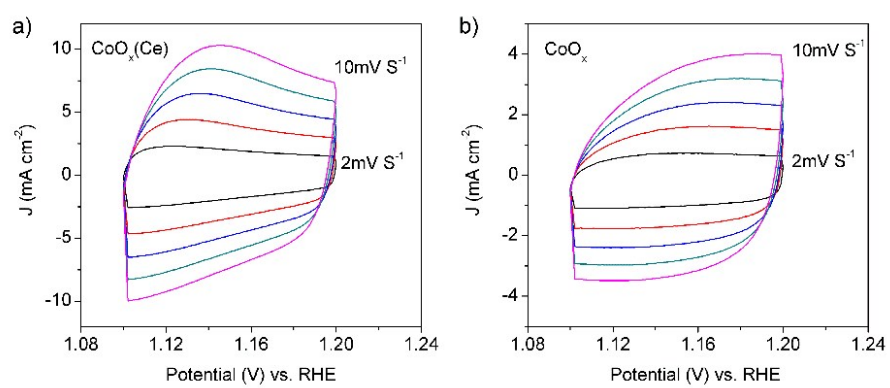

**Figure S7.** CV of (a) CoO<sub>x</sub>(Ce) and (b) CoO<sub>x</sub> measured with different scan rates.

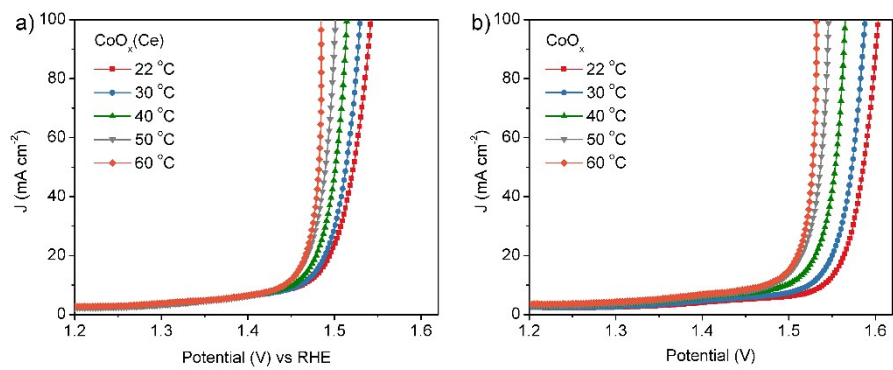

**Figure S8.** Temperature dependent polarization curves of (a)  $\text{CoO}_x(\text{Ce})$  and (b)  $\text{CoO}_x$ .

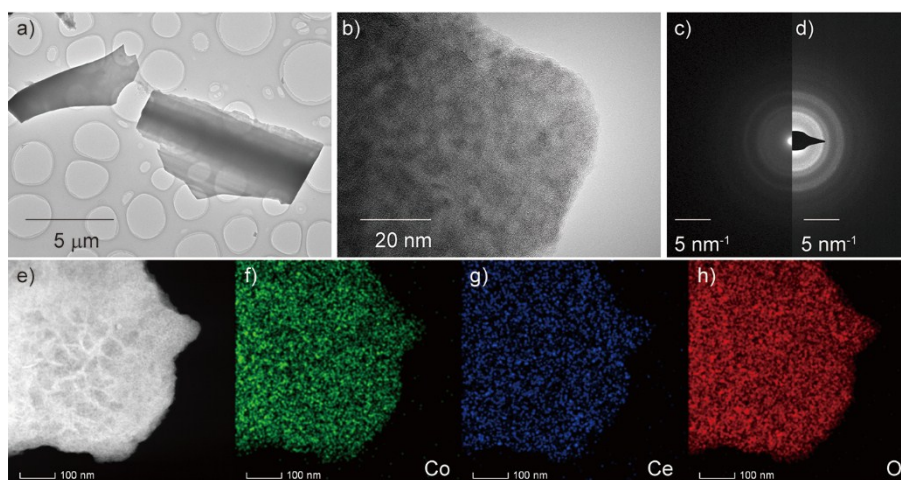

**Figure S9.** (a,b) TEM image of post-OER CoO<sub>x</sub>(Ce). SAED pattern of (c) post-OER CoO<sub>x</sub>(Ce) and (d) pristine CoO<sub>x</sub>(Ce). (e) STEM image of post-OER CoO<sub>x</sub>(Ce). EDS mapping of (f) Co, (g) Ce, and (h) O from post-OER CoO<sub>x</sub>(Ce).

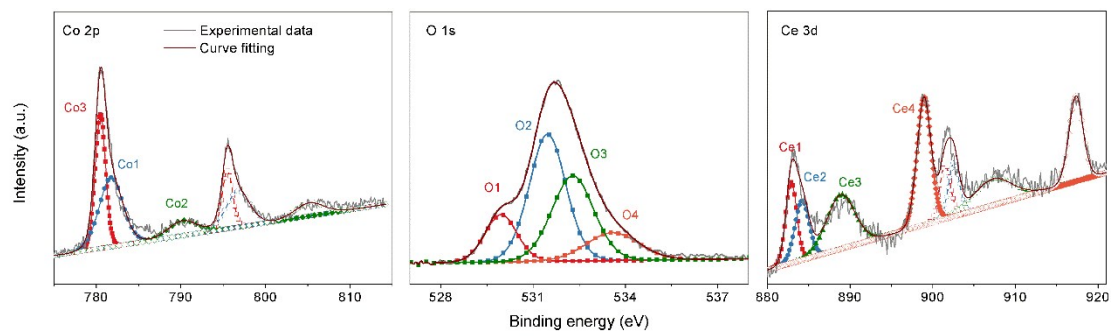

**Figure S10.** XPS of post-OER  $\text{CoO}_x(\text{Ce})$ .

## References

- [1] H. Xia, Z. P. Huang, C. C. Lv and C. Zhang, *ACS Catal.*, 2017, **7**(12), 8205-8213.
- [2] Y. R. Zheng, M. R. Gao, Q. Gao, H. H. Li, J. Xu, Z. Y. Wu and S. H. Yu, *Small*, 2015, **11**, 182-188.
- [3] Y. Yu, J. Zhang, M. Zhong and S. Guo, *Electrocatalysis*, 2018, **9**, 653-661.
- [4] X. Wang, L. Yu, B. Y. Guan, S. Song and X. W. Lou, *Adv. Mater.*, 2018, **30**, 1801211.
- [5] W. Lu, T. Liu, L. Xie, C. Tang, D. Liu, S. Hao, F. Qu, G. Du, Y. J. Ma, A. M. Asiri, and X. P. Sun, *Small*, 2017, **13**, 1700805.
- [6] M. Xie, L. Yang, Y. Ji, Z. Wang, X. Ren, Z. Liu, A. M. Asiri, X. Xiong and X. Sun, *Nanoscale*, 2017, **9**, 16612-16615.
- [7] F. Song and X. Hu, *Nat. Commun.*, 2014, **5**, 4477.
- [8] P. Guo, Y. X. Wu, W. M. Lau, H. Liu and L. M. Liu, *Journal of Alloys and Compounds*, 2017, **723**, 772-778.
- [9] F. Lyu, Y. Bai, Q. Wang, L. Wang, X. Zhang and Y. Yin, *Materials Today Chemistry*, 2019, **11**, 112-118.
- [10] M. Xiong and D. G. Ivey, *Electrochimica Acta.*, 2018, **260**, 872-881.
- [11] H. Zhong, X. Cheng, H. Xu, L. Li, D. Li, P. Tang, V. Na and Y. Feng, *Electrochimica Acta.*, 2017, **258**, 554-560.
- [12] G. Zhang, G. Wang, Y. Liu, H. Liu, J. Qu and J. Li, *J. Am. Chem. Soc.*, 2016, **138**, 14686-14693.
- [13] X. Li, G. Guan, X. Du, J. Cao, X. Hao, X. Ma, A. D. Jagadale and A. Abudula, *Chem. Commun.*, 2015, **51**, 15012-15014.
- [14] Y. Li, L. Hu, W. Zheng, X. Peng, M. Liu, P. K. Chu, L.Y and S. Lee, *Nano Energy*, 2018, **52**, 360-368.
- [15] J. Yin, Y. Li, F. Lv, Q. Fan, Y. Q. Zhao, Q. Zhang, W. Wang, F. Cheng, P. Xi and S. Guo, *ACS Nano.*, 2017, **11**, 2275-2283.
